# Supplementary material
Source: Springer Nature journal article supplement (https://www.springermedizin.de/resource/supplementary/40164_2013_77_MOESM4_ESM.pdf/9687194)

MCF7

MDA-MB-231

Bax

Bcl-2

PARP-1

Actin

|                 |   |   |    |    |   |    |     |     |
|-----------------|---|---|----|----|---|----|-----|-----|
| PEITC( $\mu$ M) | 0 | 5 | 0  | 5  | 0 | 10 | 0   | 10  |
| Taxol (nM)      | 0 | 0 | 10 | 10 | 0 | 0  | 100 | 100 |

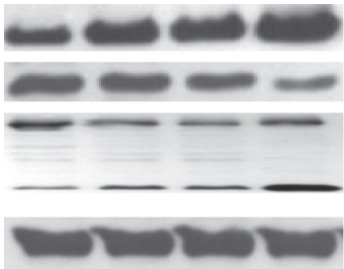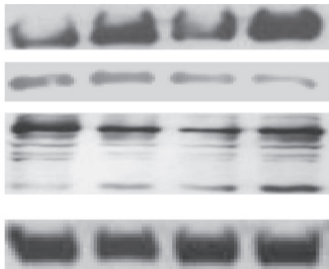

Supplement: MOESM4 [file 9687194]
